# Supplementary material for: A Systematic Review of Criminal Recidivism Rates Worldwide: Current Difficulties and Recommendations for Best Practice
Source: PubMed Central journal article supplement (PMC4472929; doi:10.1371/journal.pone.0130390), 2015-06-18
Supplement: pone.0130390.s002.pdf [file pone.0130390.s002.pdf]

# S2 Table. Recidivism Reporting Checklist

|                    |                                                        |
|--------------------|--------------------------------------------------------|
| <b>COUNTRY:</b>    |                                                        |
| <b>Population:</b> | <b>Imprisoned* - Convicted - Arrested</b>              |
| <b>Outcome:</b>    | <b>Reimprisonment - Reconviction* - Rearrest</b>       |
| <b>Follow-up:</b>  | <b>1 year - 2 years* - 3 years - 4 years - 5 years</b> |
| <b>Rate:</b>       | <b>%</b>                                               |

## DETAILED INFORMATION

| POPULATION                      | NOTES                                                                           | RECOMMENDED                                                                                                         | P# |
|---------------------------------|---------------------------------------------------------------------------------|---------------------------------------------------------------------------------------------------------------------|----|
| <b>1. Inclusion criteria</b>    |                                                                                 |                                                                                                                     |    |
| <b>a. Geographical</b>          | Are you reporting on the country as a whole, or a specific region?              | Include whole country.                                                                                              |    |
| <b>b. Index disposal</b>        | Who is included? Imprisoned, convicted, arrested? Define offences.              | Imprisoned.                                                                                                         |    |
| <b>c. Population</b>            | What institutions? Sub-sample or whole country?                                 | All adult prisons (age 18+). Report sample size.                                                                    |    |
| <b>d. Time period</b>           | When did the observation period start?                                          | Date of release from prison.                                                                                        |    |
| <b>2. Exclusion criteria</b>    |                                                                                 |                                                                                                                     |    |
| <b>a. Other samples</b>         | Who is not included? e.g. secure hospital patients, youth institutions.         | Exclude individuals sent to secure hospital, prisoners under 18.                                                    |    |
| <b>b. Other offences</b>        | What is not included? e.g. misdemeanours, minor offences, antisocial behaviour. | Include all prisoners. If any exclusions, report estimated numbers.                                                 |    |
| <b>c. Other disposals</b>       | What is not included? e.g. fines, community service, other sanctions.           | Include all prisoners. If any exclusions, report estimated numbers.                                                 |    |
| <b>3. Sample</b>                |                                                                                 |                                                                                                                     |    |
| <b>a. Basic characteristics</b> | Age, gender, ethnicity, education level.                                        | Gender. 10-year age bands (18-24, 25-34, 35-44, 45-54, 55-64, 65+).                                                 |    |
| <b>b. Index offences</b>        | What offences had been committed in the population?                             | Burglary/Theft, Fraud, Sexual offences (incl. rape), Violence against person, Motoring, Drugs, Other, not recorded. |    |
| <b>c. Disposal</b>              | If prisoners, what length of time did they stay?                                | <1 year, <5 years, <10 years, ≥10 years.                                                                            |    |

| OUTCOME                      | NOTES                                                                                | RECOMMENDED                                   | P# |
|------------------------------|--------------------------------------------------------------------------------------|-----------------------------------------------|----|
| <b>1. Inclusion criteria</b> |                                                                                      |                                               |    |
| <b>a. Geographical</b>       | Where can the recidivism occur?                                                      | Whole country.                                |    |
| <b>b. Outcome disposal</b>   | Definition of recidivism? Imprisoned, convicted, arrested?                           | Convicted of <u>any</u> offence and recalls.  |    |
| <b>c. Follow-up</b>          | How long was the sample followed-up for?                                             | 2 year follow-up (or more follow-up periods). |    |
| <b>d. Censoring</b>          | Was the follow-up data censored? e.g. by using survival analysis.                    |                                               |    |
| <b>d. Date</b>               | What date was used? e.g. date of offence, date of conviction.                        | Use date of offence.                          |    |
| <b>2. Exclusion criteria</b> |                                                                                      |                                               |    |
| <b>a. Other offences</b>     | What is not included? e.g. traffic offences, misdemeanours, etc.                     | Exclude traffic offences only.                |    |
| <b>b. Other disposal</b>     | What is not included? e.g. fines, community service, suspended sentence.             | Include all convictions. Exclude cautions.    |    |
| DATA                         | NOTES                                                                                | RECOMMENDED                                   | P# |
| <b>1. Source</b>             |                                                                                      |                                               |    |
| <b>a. Population</b>         | Where was the population sample data collected from?                                 | National prison service.                      |    |
| <b>b. Outcome</b>            | Where was outcome data collected from?                                               | National crime agency.                        |    |
| <b>2. Quality</b>            | Loss to follow-up, underreporting, misclassification etc.                            |                                               |    |
| <b>a. Linkage</b>            | How were offences to those released/convicted? (e.g. date of birth).                 | Unique identifiers.                           |    |
| <b>b. Pseudoconvictions</b>  | How were new convictions which related to offences before the index offence treated? | Exclude.                                      |    |
| <b>3. Funding</b>            | Who funded the data linkage?                                                         |                                               |    |
